# Supplementary material
Source: ML conference proceedings conference paper supplement (https://proceedings.mlr.press/v161/gimelfarb21a.html)
Supplement: Supplementary file [file gimelfarb21a-supp.pdf]

# Contextual Policy Transfer in Reinforcement Learning Domains via Deep Mixtures-of-Experts (Supplementary Material)

Michael Gimelfarb\*

Scott Sanner\*

Chi-Guhn Lee

Department of Mechanical and Industrial Engineering, University of Toronto, Toronto, Canada

## Abstract

In this Appendix, we include and provide discussion for additional plots that had to be left out of the main paper due to space limitations. We also describe all hyper-parameters chosen to reproduce the experiments in the main paper.

## ADDITIONAL PLOTS

Figure 8 illustrates the test performance on all three transfer learning experiments (Transfer-Maze, Transfer-CartPole and Transfer-SparseLunarLander) using different values of the reuse parameter  $p_t$  for the MAPSE algorithm. Figure 9 demonstrates the test performance on all transfer learning experiments using different values of the reuse parameter  $p_t$  for the UCB-based policy reuse algorithm. Figure 10 illustrates the test performance on all transfer learning experiments using different learning rates  $\beta$  for the last layer of the option-value network for the option-based context-aware policy reuse algorithm CAPS.

## FURTHER IMPLEMENTATION DETAILS

All code was written and executed using Eclipse PyDev running Python 3.7. All neural networks were initialized and trained using Keras with TensorFlow backend (version 1.14), and weights were initialized using the default setting. The Adam optimizer was used to train all neural networks. Experiments were run on an Intel 6700-HQ Quad-Core processor with 8 GB RAM running on the Windows 10 operating system. The hyper-parameter settings used in the experiments are listed in Table 1.

\* we had to decrease the learning rate for MARS and reward shaping using a single policy to avoid instability

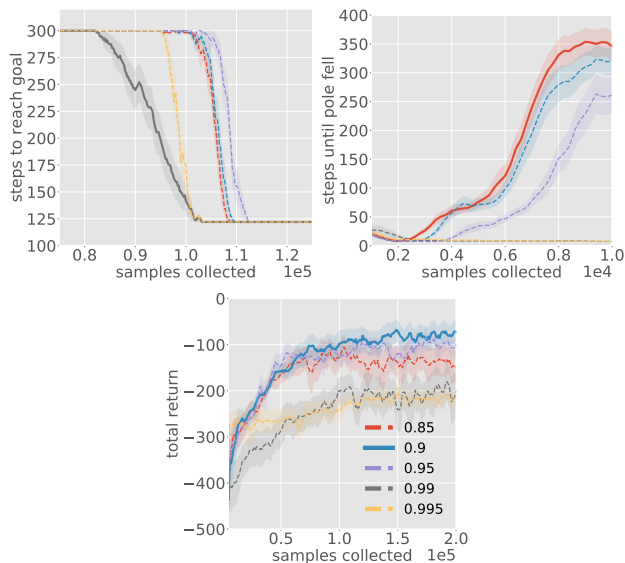

Figure 8: Smoothed mean test performance using the greedy policy for different value of  $p_t$  for MAPSE, on Transfer-Maze, Transfer-CartPole, and Transfer-SparseLunarLander (left to right). We ran 20 trials for Transfer-Maze and Transfer-CartPole and 10 trials for Transfer-SparseLunarLander.

\*\* we report the best value found in  $\{0.01, 0.001, 0.0001\}$  in the deep learning case

\*\*\*  $p_t = p^t$  where  $t$  is the episode number; we report the best  $p \in \{0.85, 0.9, 0.95, 0.99, 0.995\}$

Also, please note that for the imperfect transfer setting, we set  $c = 0.001$  for MARS and reduce the learning rate to 0.6, since the algorithm converges much slower for larger values of  $c$  or becomes unstable.

\* Affiliate to Vector Institute, Toronto, Canada.

| Parameters      |                                                  | Transfer-Maze                    | Transfer-CartPole                | Transfer-SparseLunarLander      |
|-----------------|--------------------------------------------------|----------------------------------|----------------------------------|---------------------------------|
| $T$             | maximum roll-out length                          | 300                              | 500                              | 1000                            |
| $\gamma$        | discount factor                                  | 0.95                             | 0.98                             | 0.99                            |
| $\varepsilon_t$ | exploration probability                          | 0.12                             | $\max\{0.01, 0.99^t\}$           | $\max\{0.01, 0.9925^t\}$        |
|                 | learning rate of Q-learning*                     | 0.08, 0.8                        |                                  |                                 |
|                 | replay buffer capacity                           |                                  | 5000                             | 20000                           |
| $B$             | batch size                                       |                                  | 32                               | 64                              |
| $Q$             | topology of DQN                                  |                                  | 4-40-40-4                        | 8-120-100-4                     |
|                 | hidden activation of DQN                         |                                  | ReLU                             | ReLU                            |
|                 | learning rate of DQN*                            |                                  | 0.0002, 0.0005                   | 0.0002, 0.0005                  |
|                 | learning rate for termination function weights** | 0.4                              | 0.01                             | 0.0001                          |
|                 | target network update frequency (in batches)     |                                  | 500                              | 100                             |
|                 | L2 penalty of DQN                                |                                  | $10^{-6}$                        | $10^{-6}$                       |
| $\hat{f}_i$     | topology of dynamics model                       |                                  | 8-50-50-4                        | 12-100-100-8                    |
|                 | hidden activation of dynamics model              |                                  | ReLU                             | ReLU                            |
|                 | learning rate of dynamics model                  |                                  | 0.001                            | 0.001                           |
|                 | L2 penalty of dynamics model                     |                                  | $10^{-6}$                        | $10^{-6}$                       |
| $\nu_i$         | Gaussian kernel precision                        |                                  | $5 \times 10^5$                  | $5 \times 10^5$                 |
| $\mathbf{a}$    | topology of mixture model                        | 58-30-30-4                       | 4-30-30-3                        | 8-30-30-3                       |
|                 | hidden activation of mixture                     | ReLU                             | ReLU                             | ReLU                            |
| $\lambda$       | learning rate of mixture                         | 0.001                            | 0.001                            | 0.001                           |
|                 | training epochs/batch for mixture                | 4                                | 3                                | 1                               |
| $c$             | PBRS scaling factor                              | 1.0                              | 2.0                              | 20.0                            |
| $p_t$           | probability of following source policies***      | $0.99^t$ (MAPSE), $0.85^t$ (UCB) | $0.85^t$ (MAPSE), $0.85^t$ (UCB) | $0.9^t$ (MAPSE), $0.95^t$ (UCB) |

Table 1: Hyper-parameter settings.

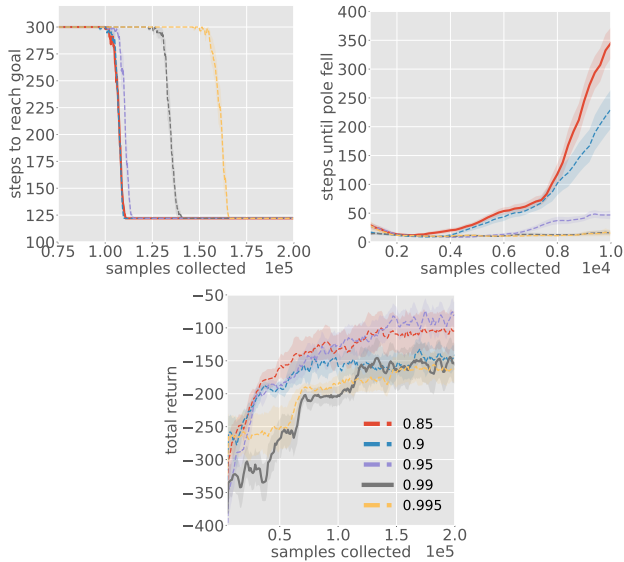

Figure 9: Smoothed mean test performance using the greedy policy for different value of  $p_t$  for UCB, on Transfer-Maze, Transfer-CartPole, and Transfer-SparseLunarLander (left to right). We ran 20 trials for Transfer-Maze and Transfer-CartPole and 10 trials for Transfer-SparseLunarLander.

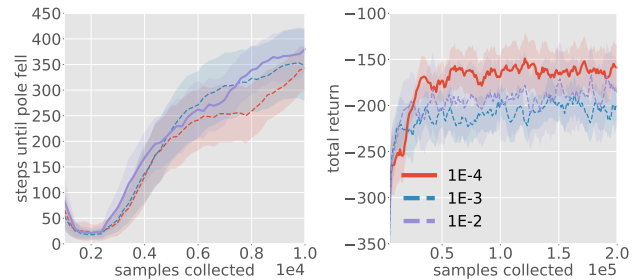

Figure 10: Smoothed mean test performance using the greedy policy for different value of termination learning rate for CAPS. From left to right: (1) number of steps balanced on Transfer-CartPole, and (2) total return on Transfer-SparseLunarLander. We ran 20 trials for Transfer-CartPole and 10 trials for Transfer-SparseLunarLander.
